# Supplementary material for: Human Body Burden of Heavy Metals and Health Consequences of Pb Exposure in Guiyu, an E-Waste Recycling Town in China
Source: MDPI journal article supplement (doi:10.3390/ijerph182312428), 2021-11-26
Supplement: s1 [file s1]

## **Supplementary Material**

### **Human body burden of heavy metals and health consequences of Pb exposure in Guiyu, an e-waste recycling town in China: A critical review**

**Wenlong Huang, Xiaoling Shi and Kusheng Wu \***

Department of Preventive Medicine, Shantou University Medical College, Shantou 515041, Guangdong, China

\* Corresponding author:

Kusheng Wu, Ph.D.

Department of Preventive Medicine, Shantou University Medical College

No.22, Xinling Rd. Shantou 515041, Guangdong, China

Tel: 86-754-88900445

Fax: 86-754-88557562

E-mail: [kswu@stu.edu.cn](mailto:kswu@stu.edu.cn)

This file includes:

1. Tables S1 to S6: Body burden of HMs in Guiyu
2. Tables S7: Correlations between Pb exposure and health outcomes
3. References

**Table S1 Pb in blood (µg/dL)**

| Ref. No. | Sampling time   | Age            | Guiyu | Reference areas | <i>p</i> value | Data genre | Reference             |
|----------|-----------------|----------------|-------|-----------------|----------------|------------|-----------------------|
| 1        | 2004            | < 6 years      | 15.30 | 9.94            | < 0.01         | Mean       | (Huo et al., 2007)    |
| 2        | 2004.9~2004.11  | 1~6 years      | 15.30 | 9.94            | < 0.01         | Mean       | (Xu et al., 2006)     |
| 3        | 2005*           | 1~6 years      | 15.30 | 9.94            | < 0.01         | Mean       | (Peng et al., 2005)   |
| 4        | 2006.3~2006.9   | 3~6 years      | 11.98 | 8.50            | < 0.01         | Mean       | (Han et al., 2007)    |
| 5        | 2006.5~2006.6   | 1~7 years      | 13.17 | 10.04           | < 0.01         | Mean       | (Zheng et al., 2008)  |
| 6        | 2008.1~2008.2   | 3~7 years      | 14.43 | 8.72            | < 0.01         | Mean       | (Liu et al., 2011a)   |
| 7        | 2010.10         | 4~6 years      | 14.53 |                 |                | Mean       | (Xu et al., 2014)     |
| 8        | 2011*           | 3~7 years      | 8.20  |                 |                | Mean       | (Liao et al., 2011)   |
| 9        | 2011.12         | 3~7 years      | 10.34 | 8.30            | < 0.001        | Mean       | (Zhang et al., 2017b) |
| 10       | 2012            | 3~7 years      | 6.44  | 4.06            | < 0.01         | Mean       | (Zeng et al., 2018)   |
| 11       | 2012.3~2013.4   | Preschool      | 6.81  | 4.98            | < 0.001        | Mean       | (Zeng et al., 2019a)  |
| 12       | 2014.12         | 3~7 years      | 6.00  | 3.92            | < 0.001        | Mean       | (Zhang et al., 2016)  |
| 13       | 2017*           | 4~7 years      | 9.40  | 5.04            | < 0.001        | Mean       | (Zhang et al., 2017a) |
| 14       | 2006~2011       | 3~7 years      | 8.19  | 6.72            | < 0.01         | Median     | (Liu et al., 2015a)   |
| 15       | 2008            | 3~7 years      | 13.89 | 8.55            | < 0.01         | Median     | (Xu et al., 2015c)    |
| 16       | 2009~2011       | 3~7 years      | 7.33  |                 |                | Median     | (Liu et al., 2014)    |
| 17       | 2011.9~2012.8   | Pregnant women | 6.66  | 3.81            | < 0.05         | Median     | (Kim et al., 2019)    |
| 18       | 2011~2013       | 18~24 years    | 6.3   | 3.5             |                |            | (Kim et al., 2020)    |
|          |                 | 25~29 years    | 6.8   | 3.8             |                |            |                       |
|          |                 | >30 years      | 6.9   | 4               |                |            |                       |
| 19       | 2011.12~2012.3  | 3 years        | 11.30 | 5.77            | < 0.001        | Median     | (Liu et al., 2015b)   |
| 20       | 2011.12~2012.3  | 3 years        | 11.30 | 5.77            | < 0.001        | Median     | (Liu et al., 2018a)   |
| 21       | 2011.12~2012.3  | < 11 years     | 7.06  | 5.89            | < 0.05         | Median     | (Guo et al., 2014)    |
| 22       | 2011.12~2012.3  | 3~7 years      | 6.76  | 6.05            | 0.0020         | Median     | (Xu et al., 2015a)    |
|          | 2011            | 3~7 years      | 8.76  | 7.89            | 0.0310         | Median     |                       |
|          | 2012            | 3~7 years      | 5.83  | 4.61            | < 0.001        | Median     |                       |
| 23       | 2012.1~2012.5   | 3~7 years      | 7.90  |                 |                | Median     | (Zhang et al., 2015)  |
| 24       | 2012            | 3~7 years      | 9.43  | 6.79            | < 0.001        | Median     | (Lin et al., 2017b)   |
| 25       | 2012*           | 3~6 years      | 9.64  | 7.84            | < 0.001        | Median     | (Sun et al., 2012)    |
| 26       | 2012.12~2013.1  | 3~8 years      | 6.24  | 4.75            | < 0.001        | Median     | (Zeng et al., 2016)   |
| 27       | 2013*           | 3~8 years      | 7.30  |                 |                | Median     | (Yang et al., 2013)   |
| 28       | 2013*           | 2~8 years      | 7.89  |                 |                | Median     | (Chen et al., 2013)   |
| 29       | 2013.11~2013.12 | 5~7 years      | 5.53  | 3.57            | < 0.001        | Median     | (Zeng et al., 2017)   |
| 30       | 2013.12         | Preschool      | 5.70  | 3.53            | < 0.01         | Median     | (Zheng et al., 2021)  |
| 31       | 2014            | 3~7 years      | 5.06  | 3.60            | < 0.001        | Median     | (Cao et al., 2018)    |
| 32       | 2014            | 3~6 years      | 8.50  | 6.00            | < 0.001        | Median     | (Wang et al., 2021)   |
| 33       | 2014            | 3~7 years      | 4.94  | 3.85            | < 0.001        | Median     | (Liu et al., 2018b)   |
| 34       | 2014.12         | 3~7 years      | 3.72  | 2.27            | < 0.001        | Median     | (Zhang et al., 2020b) |
| 35       | 2014.12         | 3~7 years      | 5.29  | 3.63            | < 0.001        | Median     | (Xu et al., 2020)     |

|    |                 |             |                |                |         |        |                       |
|----|-----------------|-------------|----------------|----------------|---------|--------|-----------------------|
| 36 | 2014.12~2015.3  | 2~7 years   | 5.61           | 3.57           | < 0.001 | Median | (Lin et al., 2016)    |
| 37 | 2014.1~2016.12  | 44~80 years | 2.93 ~<br>4.06 | 3.14 ~<br>3.79 | > 0.05  | Median | (Lin et al., 2017a)   |
| 38 | 2014.12~2015.6  | 4~85 years  | 8.70           | 5.10           | 0.0010  | Median | (Chen et al., 2019)   |
| 39 | 2015.11         | 2~6 years   | 6.50           | 4.50           | < 0.01  | Median | (Dai et al., 2017)    |
| 40 | 2015.11~2015.12 | 2~7 years   | 6.51           | 4.41           | < 0.01  | Median | (Huo et al., 2019)    |
| 41 | 2016.11~2016.12 | 3~7 years   | 7.14           | 3.91           | < 0.001 | Median | (Lu et al., 2018)     |
| 42 | 2016.11~2016.12 | 3~7 years   | 7.23           | 3.91           | < 0.001 | Median | (Zheng et al., 2019)  |
| 43 | 2017            | 3~7 years   | 4.89           | 3.47           | < 0.001 | Median | (Zhang et al., 2020a) |
| 44 | 2017.10~2017.12 | 3~7 years   | 5.19           | 3.42           | < 0.001 | Median | (Zeng et al., 2021)   |
| 45 | 2017.11~2017.12 | 3~6 years   | 4.88           | 3.47           | < 0.001 | Median | (Cai et al., 2019)    |
| 46 | 2017.11~2017.12 | 2.5~6 years | 4.86           | 3.47           | < 0.001 | Median | (Hou et al., 2020)    |
| 47 | 2018*           | 3~6 years   | 7.43           |                |         | Median | (Xu et al., 2018)     |
| 48 | 2018.11~2018.12 | 2~7 years   | 4.51           | 3.98           | < 0.001 | Median | (Chen et al., 2021)   |

\*Year of article published (As no “sampling time” provided in some original publications, we used “publication year” as an alternative proxy, similarly hereinafter)

**Table S2 Cd in blood (µg/L)**

| Ref. No. | Sampling time   | Age            | Guiyu | Reference areas | P value | Data genre | Reference             |
|----------|-----------------|----------------|-------|-----------------|---------|------------|-----------------------|
| 1        | 2006.5~2006.6   | 1~7 years      | 1.58  | 0.97            | < 0.01  | Mean       | (Zheng et al., 2008)  |
| 2        | 2010.10         | 4~6 years      | 0.77  |                 |         | Mean       | (Xu et al., 2014)     |
| 3        | 2011.12         | 3~7 years      | 2.39  | 1.79            | < 0.001 | Mean       | (Zhang et al., 2017b) |
| 4        | 2004.5~2009.10  | 3~7 years      |       |                 |         | Median     | (Lin et al., 2010)    |
| 5        | 2009~2011       | 3~7 years      | 0.69  |                 |         | Median     | (Liu et al., 2014)    |
| 6        | 2011.9~2012.8   | Pregnant women | 1.72  | 1.43            | < 0.05  | Median     | (Kim et al., 2019)    |
| 7        | 2011.12~2012.3  | 3 years        | 1.22  | 0.72            | < 0.001 | Median     | (Liu et al., 2018a)   |
| 8        | 2012.1~2012.5   | 3~7 years      | 0.95  |                 |         | Median     | (Zhang et al., 2015)  |
| 9        | 2012            | 3~7 years      | 0.12  | 0.27            | < 0.001 | Median     | (Lin et al., 2017b)   |
| 10       | 2012*           | 3~6 years      | 2.29  | 1.68            | < 0.001 | Median     | (Sun et al., 2012)    |
| 11       | 2012.3~2013.4   | Preschool      | 0.66  | 0.54            | < 0.001 | Median     | (Zeng et al., 2019a)  |
| 12       | 2012.12~2013.1  | 3~8 years      | 0.58  | 0.50            | < 0.01  | Median     | (Zeng et al., 2016)   |
| 13       | 2013*           | 3~8 years      | 0.69  |                 |         | Median     | (Yang et al., 2013)   |
| 14       | 2013.11~2013.12 | 5~7 years      | 0.58  | 0.57            | 0.7170  | Median     | (Zeng et al., 2017)   |
| 15       | 2013.12         | Preschool      | 0.56  | 0.47            | < 0.05  | Median     | (Zheng et al., 2021)  |
| 16       | 2014.12         | 3~7 years      | 0.33  | 0.23            | < 0.001 | Median     | (Zhang et al., 2020b) |
| 17       | 2015.12~2015.6  | 4~85 years     | 2.10  | 2.60            | 0.4600  | Median     | (Chen et al., 2019)   |
| 18       | 2018*           | 3~6 years      | 0.72  |                 |         | Median     | (Xu et al., 2018)     |

\*Year of article published

**Table S3 Other metals (Cr, Mn, Ni, Hg, As, Cu, Zn and Se) in blood**

| Ref. No.                  | Sampling time  | Age            | Guiyu           | Reference areas | <i>p</i> value | Data genre | Reference             |
|---------------------------|----------------|----------------|-----------------|-----------------|----------------|------------|-----------------------|
| <b>Cr in Blood (µg/L)</b> |                |                |                 |                 |                |            |                       |
| 1                         | 2004           | 3~7 years      | 120.30          | 63.10           | < 0.0001       | Mean       | (Xu et al., 2015d)    |
|                           | 2006           | 3~7 years      | 165.40          | 44.10           | < 0.0001       | Mean       |                       |
|                           | 2008           | 3~7 years      | 63.40           | 28.20           | < 0.0001       | Mean       |                       |
| 2                         | 2011*          | 3~7 years      | 174.30          |                 |                | Mean       | (Liu et al., 2011b)   |
| 3                         | 2013*          | 8~13 years     | 35.50           | 34.10           | > 0.05         | Median     | (Zheng et al., 2013)  |
| 4                         | 2011.9~2012.8  | Pregnant women | 13.78           | 8.90            | < 0.05         | Median     | (Kim et al., 2019)    |
| 5                         | 2012           | 3~7 years      | 14.38           | 10.64           | 0.0050         | Median     | (Lin et al., 2017b)   |
| 6                         | 2012.12~2013.1 | 3~8 years      | 7.65            | 7.49            | 0.3790         | Median     | (Zeng et al., 2016)   |
| 7                         | 2012.3~2013.4  | Preschool      |                 |                 | > 0.05         |            | (Zeng et al., 2019a)  |
| <b>Mn in Blood (µg/L)</b> |                |                |                 |                 |                |            |                       |
| 1                         | 2013*          | 8~13 years     | 20.60           | 14.90           | < 0.01         | Median     | (Zheng et al., 2013)  |
| 2                         | 2011.9~2012.8  | Pregnant women | 25.93           | 28.51           | < 0.05         | Median     | (Kim et al., 2019)    |
| 3                         | 2012           | 3~7 years      | 16.31           | 15.08           | 0.0300         | Median     | (Lin et al., 2017b)   |
| 4                         | 2012.3~2013.4  | Preschool      |                 |                 | > 0.05         |            | (Zeng et al., 2019a)  |
| 5                         | 2012.12~2013.1 | 3~8 years      | 28.18           | 28.09           | 0.9330         | Median     | (Zeng et al., 2016)   |
| 6                         | 2009~2011      | 3~7 years      | 17.98           |                 |                | Median     | (Liu et al., 2014)    |
| 7                         | 2014.1~2016.12 | 44~80 years    | 12.10 ~ 20.10   | 9.00 ~ 11.10    | < 0.01         | Median     | (Lin et al., 2017a)   |
| <b>Ni in Blood (µg/L)</b> |                |                |                 |                 |                |            |                       |
| 1                         | Not given      | 8~13 years     | 5.30            | 3.00            | < 0.01         | Median     | (Zheng et al., 2013)  |
| 2                         | 2012           | 3~7 years      | 4.41            | 3.44            | 0.0590         | Median     | (Lin et al., 2017b)   |
| <b>Hg in Blood (µg/L)</b> |                |                |                 |                 |                |            |                       |
| 1                         | 2012           | 3~7 years      | 1.92            | 2.25            | 0.0510         | Median     | (Lin et al., 2017b)   |
| 2                         | 2018*          | 3~6 years      | 11.13           |                 |                |            | (Xu et al., 2018)     |
| 2                         | 2014.12        | 3~7 years      | 1.46            | 1.10            | < 0.001        | Median     | (Zhang et al., 2020b) |
| <b>As in Blood (µg/L)</b> |                |                |                 |                 |                |            |                       |
| 1                         | 2012           | 3~7 years      | 5.53            | 6.56            | 0.0020         | Median     | (Lin et al., 2017b)   |
| 2                         | 2014.12        | 3~7 years      | 5.91            | 4.18            | < 0.001        | Median     | (Zhang et al., 2020b) |
| <b>Cu in Blood (µg/L)</b> |                |                |                 |                 |                |            |                       |
| 1                         | 2012           | 3~7 years      | 919.10          | 842.45          | < 0.001        | Median     | (Lin et al., 2017b)   |
| 2                         | 2014.1~2016.12 | 44~80 years    | 780.70 ~ 966.40 | 740.50 ~ 986.30 | > 0.05         | Median     | (Lin et al., 2017a)   |
| <b>Zn in Blood (µg/L)</b> |                |                |                 |                 |                |            |                       |
| 1                         | 2012           | 3~7 years      | 4746.39         | 4313.03         | 0.0390         | Median     | (Lin et al., 2017b)   |
| <b>Se in Blood (µg/L)</b> |                |                |                 |                 |                |            |                       |
| 1                         | 2012           | 3~7 years      | 135.77          | 149.06          | 0.0270         | Median     | (Lin et al., 2017b)   |

\*Year of article published

**Table S4 Metals in umbilical cord blood (UCB)**

| Ref. No.                 | Sampling time  | Guiyu | Reference areas | <i>p</i> value | Data genre | References            |
|--------------------------|----------------|-------|-----------------|----------------|------------|-----------------------|
| <b>Cr in UCB (µg/L)</b>  |                |       |                 |                |            |                       |
| 1                        | 2006           | 93.87 | 18.10           | < 0.01         | Median     | (Li et al., 2008a)    |
|                          | 2007           | 70.60 | 24.00           | < 0.01         | Median     |                       |
| 2                        | 2011.6~2012.9  | 5.90  | 6.23            | > 0.05         | Mean       | (Zeng et al., 2019b)  |
| 3                        | 2011.9~2012.8  | 4.02  | 3.52            | > 0.05         | Median     | (Kim et al., 2019)    |
| 4                        | 2012.3~2013.1  | 27.52 | 26.42           | > 0.05         | Median     | (Ni et al., 2014b)    |
| <b>Pb in UCB (µg/dL)</b> |                |       |                 |                |            |                       |
| 1                        | 2001~2008      | 11.59 | 2.33            | < 0.01         | Mean       | (Xu et al., 2012)     |
| 2                        | 2006.7~2006.10 | 11.33 | 6.04            | < 0.01         | Mean       | (Li et al., 2008c)    |
| 3                        | 2011.6~2012.9  | 7.34  | 3.07            | < 0.001        | Mean       | (Zeng et al., 2019b)  |
| 4                        | 2004.12~2005.6 | 10.50 | 7.79            | < 0.05         | Median     | (Huo et al., 2014)    |
| 5                        | 2011.9~2012.8  | 5.03  | 3.18            | < 0.05         | Median     | (Kim et al., 2019)    |
| 6                        | 2012.3~2013.1  | 11.05 | 5.73            | < 0.001        | Median     | (Ni et al., 2014b)    |
| <b>Cd in UCB (µg/L)</b>  |                |       |                 |                |            |                       |
| 1                        | 2004~2005      | 5.86  | 4.84            | > 0.05         | Mean       | (Li et al., 2011)     |
|                          | 2006           | 5.30  | 1.82            | < 0.01         | Mean       |                       |
|                          | 2007           | 3.47  | 0.94            | < 0.01         | Mean       |                       |
|                          | 2004~2007      | 4.84  | 2.81            | < 0.01         | Mean       |                       |
| 2                        | 2011.6~2012.9  | 0.22  | 0.29            | > 0.05         | Mean       | (Zeng et al., 2019b)  |
| 3                        | 2011.9~2012.8  | 0.18  | 0.23            | < 0.05         | Median     | (Kim et al., 2019)    |
| 4                        | 2012.3~2013.1  | 2.50  | 0.33            | < 0.001        | Median     | (Ni et al., 2014b)    |
| <b>Hg in UCB (µg/L)</b>  |                |       |                 |                |            |                       |
| 1                        | 2008.1~2010.12 | 8.52  | 8.37            | < 0.01         | Median     | (Zhuang et al., 2015) |
| <b>Ni in UCB (µg/L)</b>  |                |       |                 |                |            |                       |
| 1                        | 2012.3~2013.1  | 8.63  | 9.09            | > 0.05         | Median     | (Ni et al., 2014b)    |
| <b>Mn in UCB (µg/L)</b>  |                |       |                 |                |            |                       |
| 1                        | 2011.9~2012.8  | 52.93 | 49.69           | < 0.05         | Median     | (Kim et al., 2019)    |
| 2                        | 2011.6~2012.9  | 54.01 | 51.21           | > 0.05         | Mean       | (Zeng et al., 2019b)  |

**Table S5 Metals in placenta**

| Ref. No.                        | Sampling time  | Guiyu  | Reference areas | <i>p</i> value | Data genre | Reference            |
|---------------------------------|----------------|--------|-----------------|----------------|------------|----------------------|
| <b>Cd in Placenta (ng/g wt)</b> |                |        |                 |                |            |                      |
| 1                               | 2006           | 170.00 | 100.00          | < 0.01         | Mean       | (Li et al., 2011)    |
| 2                               | 2006.5~2006.9  | 170.00 | 100.00          | < 0.05         | Mean       | (Li et al., 2010)    |
| 3                               | 2012.3~2012.8  | 96.19  | 12.65           | < 0.001        | Mean       | (Xu et al., 2016)    |
| 4                               | 2006~2010      | 92.90  | 23.90           | < 0.01         | Median     | (Lin et al., 2013)   |
| 5                               | 2008.10~2009.5 | 108.75 | 104.15          | 0.8420         | Median     | (Guo et al., 2010)   |
| 6                               | 2008.10~2009.6 | 83.99  | 51.59           | < 0.001        | Median     | (Zhang et al., 2011) |
| 7                               | 2010.9~2011.9  | 96.56  | 20.87           | < 0.01         | Median     | (Xu et al., 2015b)   |
| 8                               | 2010.9~2011.9  | 96.60  | 20.90           | < 0.01         | Median     | (Qiu et al., 2012)   |

|                                 |                |         |         |         |        |                      |
|---------------------------------|----------------|---------|---------|---------|--------|----------------------|
| 9                               | 2012*          | 96.56   | 21.15   | < 0.001 | Median | (Qiu, 2012)          |
| <b>Pb in Placenta (ng/g wt)</b> |                |         |         |         |        |                      |
| 1                               | 2012.3~2012.8  | 498.80  | 27.01   | < 0.001 | Mean   | (Xu et al., 2016)    |
| 2                               | 2006~2010      | 1249.10 | 1353.50 | > 0.05  | Median | (Lin et al., 2013)   |
| 3                               | 2008.10~2009.5 | 301.43  | 165.82  | 0.0100  | Median | (Guo et al., 2010)   |
| 4                               | 2008.10~2009.6 | 521.01  | 273.24  | 0.2990  | Median | (Zhang et al., 2011) |
| 5                               | 2012*          | -       | -       | > 0.05  |        | (Qiu, 2012)          |
| 6                               | 2010.9~2010.12 | 399.90  | 421.00  | > 0.05  | Median | (Qiu et al., 2012)   |
| <b>Cr in Placenta (ng/g wt)</b> |                |         |         |         |        |                      |
| 1                               | 2008.10~2009.5 | 234.31  | 228.40  | 0.7360  | Median | (Guo et al., 2010)   |
| <b>Ni in Placenta (ng/g wt)</b> |                |         |         |         |        |                      |
| 1                               | 2008.10~2009.5 | 7.64    | 14.30   | < 0.001 | Median | (Guo et al., 2010)   |

\*Year of article published

**Table S6 Metals in other human matrix (urine, meconium, erythrocyte and hair)**

| Ref. No.                      | Sampling time   | Age            | Guiyu  | Reference areas | P value | Data genre | Reference            |
|-------------------------------|-----------------|----------------|--------|-----------------|---------|------------|----------------------|
| Pb in erythrocyte (μg/dL)     |                 |                |        |                 |         |            |                      |
| 1                             | 2006~2011       | 3~7 years      | 21.95  | 17.32           | < 0.01  | Median     | (Liu et al., 2015a)  |
| 2                             | 2015.11         | 2~6 years      | 17.00  | 11.90           | < 0.001 | Median     | (Dai et al., 2017)   |
| 3                             | 2015.11~2015.12 | 2~7 years      | 16.605 | 11.771          | < 0.001 | Median     | (Huo et al., 2019)   |
| Cd in urine (μg/g creatinine) |                 |                |        |                 |         |            |                      |
| 1                             | 2011.9~2012.6   | Pregnant women | 1.38   | 0.75            | < 0.01  | Mean       | (Zhang et al., 2018) |
|                               |                 |                | 1.59   | 0.76            | < 0.01  | Mean       |                      |
|                               |                 |                | 0.92   | 0.67            | < 0.01  | Median     |                      |
|                               |                 |                | 1.00   | 0.59            | < 0.01  | Median     |                      |
| 2                             | 2011.9~2012.8   | Pregnant women | 1.06   | 0.54            | < 0.05  | Median     | (Kim et al., 2019)   |
| 3                             | 2014            | 3~7 years      | 2.49   | 1.80            | 0.1340  | Median     | (Liu et al., 2018b)  |
| 4                             | 2014.12         | 3~7 years      | 1.52   | 1.21            | 0.3230  | Median     | (Xu et al., 2020)    |
| Cr in urine (μg/g creatinine) |                 |                |        |                 |         |            |                      |
| 1                             | 2011.9~2012.8   | Pregnant women | 1.66   | 0.97            | < 0.05  | Median     | (Kim et al., 2019)   |
| Mn in urine (μg/g creatinine) |                 |                |        |                 |         |            |                      |
| 1                             | 2011.9~2012.8   | Pregnant women | 7.62   | 3.14            | < 0.05  | Median     | (Kim et al., 2019)   |
| Hg in hair (μg/g)             |                 |                |        |                 |         |            |                      |
| 1                             | 2012.4~2012.6   | Residents      | 1.12   | 0.65            | < 0.001 | Mean       | (Ni et al., 2014a)   |
|                               |                 |                | 0.99   | 0.59            | < 0.001 | Median     |                      |
| Sb in hair (ng/g)             |                 |                |        |                 |         |            |                      |
| 1                             | 2012.4~2012.6   | Residents      | 389.66 | 87.96           | < 0.001 | Mean       | (Huang et al., 2015) |
|                               |                 |                | 160.78 | 61.74           | < 0.001 | Median     |                      |
| Pb in meconium (μg/g)         |                 |                |        |                 |         |            |                      |
| 1                             | Not given       | Neonates       | 1.93   | 1.01            | < 0.01  | Mean       | (Li et al., 2008b)   |
| 2                             | 2006.7~2006.10  | Neonates       | 2.50   | 1.20            | < 0.01  | Mean       | (Li et al., 2008c)   |

**Table S7. The effects of Pb exposure on several health outcomes in neonate, children and adults in Guiyu**

| Reference                    | Exposed population                     | Matrix*     | Health consequences                                                                                                                                                              |
|------------------------------|----------------------------------------|-------------|----------------------------------------------------------------------------------------------------------------------------------------------------------------------------------|
| <b><u>Nervous system</u></b> |                                        |             |                                                                                                                                                                                  |
| (Li et al., 2008c)           | Guiyu vs. Chaonan (Neonate)            | MPb, UCB-Pb | Negative associations between Pb and total NMNA, activity tone, and behavior scores.                                                                                             |
| (Zhang et al., 2017a)        | Guiyu vs. Haojiang (4~ 7 years, n=118) | BPb         | BDNF was positively correlated with Pb. Olfactory memory tests scores negatively correlated with Pb.                                                                             |
| (Liu et al., 2015b)          | Guiyu vs. Nanao (3 years, n=284)       | BPb         | Lower cognitive and language scores in Guiyu children (both $p<0.001$ ).                                                                                                         |
| (Liu et al., 2018a)          | Guiyu vs. Nanao (3 years, n=284)       | BPb         | Pb negatively correlated with cognitive and language scores (both $p<0.001$ )                                                                                                    |
| (Liu et al., 2014)           | Guiyu only (3~7 years, n=240)          | BPb         | Lower IQ score (95.4), Pb positively correlated with conduct problems, impulsivity-hyperactivity, ADHD index and Rutter antisocial behavior.                                     |
| (Zhang et al., 2015)         | Guiyu only (3 ~7 years, n=243)         | BPb         | ADHD scores positively correlated with Pb, children with high Pb ( $\geq 10 \mu\text{g/dL}$ ) had 2.4 times higher risk of ADHD than those with low Pb ( $<10 \mu\text{g/dL}$ ). |
| (Chen et al., 2013)          | Guiyu only (2 ~8 years, n=172)         | BPb         | Positive correlations among Pb and the total and subtypes scores of ADHD (all $p<0.01$ ).                                                                                        |
| (Liu et al., 2011a)          | Guiyu vs. Chendian (3~7 years, n=303)  | BPb         | Higher scores of activity level, approach-withdrawal, and adaptability dimensions in Guiyu children (all $p<0.01$ ).                                                             |
| (Han et al., 2007)           | Guiyu vs. Chendian (3~6 years, n=136)  | BPb         | Lower IQ score in Guiyu children (aged 3~4 years) ( $p<0.01$ )                                                                                                                   |
| (Liu et al., 2018b)          | Guiyu vs. Haojiang (3 ~7 years, n=234) | BPb         | Elevated hearing thresholds and hearing loss prevalence in Guiyu children. Pb showed a significant OR (1.24) for hearing loss in children by adjusting confounders.              |
| (Xu et al., 2020)            | Guiyu vs. Haojiang (3 ~7 years, n=116) | BPb         | Higher hearing thresholds in either ear of the exposed children                                                                                                                  |

|                                     |                                           |            |                                                                                                                                                                                                                                                            |
|-------------------------------------|-------------------------------------------|------------|------------------------------------------------------------------------------------------------------------------------------------------------------------------------------------------------------------------------------------------------------------|
| (Cai et al., 2019)                  | Guiyu vs. Haojiang<br>(3 ~6 years, n=574) | BPb        | Sensory processing scores were positively correlated with Pb.                                                                                                                                                                                              |
| <b><u>Cardiovascular system</u></b> |                                           |            |                                                                                                                                                                                                                                                            |
| (Lu et al., 2018)                   | Guiyu vs. Haojiang<br>(3 ~7 years, n=590) | BPb        | lnBPb was positively associated with TG ( $p<0.05$ ) and negatively with HDL ( $p<0.05$ ), SBP and PP (both $p<0.01$ ).                                                                                                                                    |
| (Zheng et al., 2019)                | Guiyu vs. Haojiang<br>(3 ~7 years, n=203) | BPb        | Pb was positively related to IL-6, IL-12p70, IP-10.                                                                                                                                                                                                        |
| (Chen et al., 2021)                 | Guiyu vs. Haojiang<br>(3 ~7 years, n=486) | BPb        | Smaller left ventricle and impaired systolic function were found in Pb-exposed children.                                                                                                                                                                   |
| <b><u>Immune system</u></b>         |                                           |            |                                                                                                                                                                                                                                                            |
| (Zhang et al., 2016)                | Guiyu vs. Haojiang<br>(3 ~7 years, n=411) | BPb        | IL-1 $\beta$ and IL-6 were positively associated with Pb. NK cells were negatively correlated with Pb. IL-27 was negatively associated with Pb.                                                                                                            |
| (Zhang et al., 2017b)               | Guiyu vs. Haojiang<br>(3 ~7 years, n=294) | BPb        | Higher absolute counts of monocytes, eosinophils, neutrophils (all $p<0.001$ ) and basophils ( $p<0.05$ ), higher percentages of eosinophils ( $p<0.01$ ) and neutrophils in ( $p<0.001$ ), lower percentages of NK cells ( $p<0.001$ ) in Guiyu children. |
| (Dai et al., 2017)                  | Guiyu vs. Haojiang<br>(2 ~6 years, n=484) | BPb<br>EPb | Both BPb and EPb negatively related to CR1 levels.                                                                                                                                                                                                         |
| (Lin et al., 2016)                  | Guiyu vs. Haojiang<br>(2 ~7 years, n=378) | BPb        | Lower antibody titers against MMR (measles, mumps, and rubella) in Guiyu children (all $p<0.001$ ).                                                                                                                                                        |
| (Xu et al., 2015a)                  | Guiyu vs. Haojiang<br>(3 ~7 years, n=590) | BPb        | Lower hepatitis b surface antibody levels (HBs Ab 1.04 vs. 4.06 s/co, $p<0.001$ ) in Guiyu children. Pb was negatively associated with HBs Ab.                                                                                                             |
| (Sun et al., 2012)                  | Guiyu vs. Haojiang<br>(3 ~6 years, n=237) | BPb        | Lower percentages of NK cells in Guiyu group.                                                                                                                                                                                                              |



|                                  |                                                  |          |                                                                                                                                                                                                       |
|----------------------------------|--------------------------------------------------|----------|-------------------------------------------------------------------------------------------------------------------------------------------------------------------------------------------------------|
| (Lin et al., 2017b)              | Guiyu vs. Haojiang<br>(3 ~7 years, n=284)        | BPb      | Lower levels of vaccine antibodies (Diphtheria, Pertussis, Tetanus, Japanese encephalitis, Polio, Measles) in Guiyu children (all $p<0.01$ ). All vaccine antibodies negatively correlated with Pb.   |
| (Cao et al., 2018)               | Guiyu vs. Haojiang<br>(3 ~7 years, n=118)        | BPb      | Pb was positively associated with CD4+ central memory T cells, negatively associated with CD4+ Tn cells.                                                                                              |
| (Zheng et al., 2019)             | Guiyu vs. Haojiang<br>(3 ~7 years, n=203)        | BPb      | Higher percentages of CD4 <sup>+</sup> T cells (56.52% vs. 52.53%, $p<0.01$ ) in Guiyu children.                                                                                                      |
| (Huo et al., 2019)               | Guiyu vs. Haojiang<br>(2 ~7 years, n=267)        | BPb      | Higher erythrocyte Pb was associated with lower CD44 and CD58, BPb correlated with higher IL-12p70 and IFN- $\gamma$ , and lower IL-2                                                                 |
| (Zhang et al., 2020b)            | Guiyu vs. Haojiang<br>(2 ~7 years, n=147)        | BPb      | Anti-inflammatory IL-1RA concentration was negatively related with Pb; pro-inflammatory IL-1b and IL-6 were positively correlated with Pb.                                                            |
| (Zheng et al., 2021)             | Guiyu vs. Haojiang<br>(2 ~7 years, n=324)        | BPb      | Pb positively associated with serum levels of IFN- $\gamma$ , and negatively associated with serum levels of IL-13.                                                                                   |
| <b><u>Hematologic System</u></b> |                                                  |          |                                                                                                                                                                                                       |
| (Zeng et al., 2018)              | Guiyu vs. Haojiang<br>(3 ~7 years, n=466)        | BPb      | Elevated PLT, PCT, MPV (all $p<0.001$ ), and P-LCR ( $p<0.01$ ) in Guiyu children. Positive correlation between Pb and PLT, PCT, PDW, MPV and P-LCR.                                                  |
| (Liu et al., 2015a)              | Guiyu vs. Chendian & Chaonan (3~7 years, n=855)  | BPb, EPb | Hgb and HCT negatively correlated with EPb (both $p<0.001$ ). EPb is better than BPb to assess hematoxicity of Pb. EPb is negatively associated with Hgb.                                             |
| (Zhang et al., 2016)             | Guiyu vs. Haojiang<br>(3 ~7 years, n=411)        | BPb      | Elevated PLT ( $p<0.05$ ), decrease lymphocyte ( $p<0.01$ ), no significant differences in monocyte, erythrocyte, neutrophil. PLT, neutrophil and monocyte counts correlated with Pb.                 |
| (Zeng et al., 2017)              | Guiyu vs. Haojiang & Xiashan (5 ~7 years, n=206) | BPb      | Lower Hgb (128.17 vs. 131.49 g/L, $p<0.05$ ). Elevated PLT, PCT, RDW-SD and RDW-CV (all $p<0.001$ ). Living in Guiyu was positively associated with PLT ( $p<0.01$ ), negatively associated with Hgb. |

|                              |                                                  |          |                                                                                                                                                                                                                                                                                                                                                         |
|------------------------------|--------------------------------------------------|----------|---------------------------------------------------------------------------------------------------------------------------------------------------------------------------------------------------------------------------------------------------------------------------------------------------------------------------------------------------------|
| (Dai et al., 2017)           | Guiyu vs. Haojiang<br>(2 ~6 years, n=484)        | BPb, EPb | Elevated HCT ( $p<0.01$ ), monocytes ( $p<0.05$ ) and decrease MCHC ( $p<0.01$ ) in Guiyu children. BPb negatively correlated with the HCT, MCV, Hgb and MCH (all $p<0.01$ ), positively associated with RDW ( $p<0.05$ ). EPb also negatively correlated with the HCT, MCV, Hgb and MCH (all $p<0.001$ ), positively associated with RDW ( $p<0.01$ ). |
| (Zheng et al., 2019)         | Guiyu vs. Haojiang<br>(3 ~7 years, n=203)        | BPb      | Elevated monocytes, neutrophils and leukocytes (all $p<0.01$ ) in Guiyu children. Pb positively related to neutrophil and monocyte.                                                                                                                                                                                                                     |
| (Chen et al., 2019)          | Guiyu vs. Jinping<br>(4~85 years, n=267)         | BPb      | Higher Hgb (137.0 vs. 123.0 g/L) and RBC (both $p=0.001$ ). Pb positively correlated with Hgb.                                                                                                                                                                                                                                                          |
| (Sun et al., 2012)           | Guiyu vs. Haojiang<br>(3 ~6 years, n=237)        | BPb      | Elevated eosinophils and neutrophil.                                                                                                                                                                                                                                                                                                                    |
| (Chen et al., 2021)          | Guiyu vs. Haojiang<br>(3 ~7 years, n=486)        | BPb      | Elevated blood Pb levels were significantly associated with higher counts of WBCs and neutrophils.                                                                                                                                                                                                                                                      |
| (Wang et al., 2021)          | Guiyu vs. Haojiang<br>(3 ~6 years, n=222)        | BPb      | Hgb level decreased with elevate BPb. Prevalence of anaemia significantly higher in the exposed group.                                                                                                                                                                                                                                                  |
| (Zhang et al., 2020a)        | Guiyu vs. Haojiang<br>(3 ~7 years, n=207)        | BPb      | BPb positively correlated with peripheral monocyte percentage.                                                                                                                                                                                                                                                                                          |
| <b><u>Growth effects</u></b> |                                                  |          |                                                                                                                                                                                                                                                                                                                                                         |
| (Zheng et al., 2008)         | Guiyu vs. Chendian<br>(1~7 years, n=278)         | BPb      | Lower height (104.35 vs. 105.81 cm, $p<0.01$ ). Significant increasing trend in Pb with increasing age in Guiyu ( $p<0.01$ ).                                                                                                                                                                                                                           |
| (Zhang et al., 2017a)        | Guiyu vs. Haojiang<br>(4~ 7 years, n=118)        | BPb      | Lower height (107.62 vs. 112.53, $p<0.01$ ), weight (17.47 vs. 18.72, $p<0.05$ ) and chest circumference (50.56 vs. 51.80 cm, $p<0.05$ ), no differences in head circumference.                                                                                                                                                                         |
| (Zeng et al., 2017)          | Guiyu vs. Haojiang & Xiashan (5 ~7 years, n=206) | BPb      | Lower height (111.03 vs. 112.56 cm, $p<0.05$ ), no differences in weight and BMI.                                                                                                                                                                                                                                                                       |
| (Yang et al., 2013)          | Guiyu only<br>(3 ~8 years, n=246)                | BPb      | Pb negatively correlated with both height and weight, positively correlated with bone resorption biomarker.                                                                                                                                                                                                                                             |

|                       |                                                    |     |                                                                                                                                                                                                                                                                                       |
|-----------------------|----------------------------------------------------|-----|---------------------------------------------------------------------------------------------------------------------------------------------------------------------------------------------------------------------------------------------------------------------------------------|
| (Xu et al., 2014)     | Guiyu only<br>(4 ~6 years, n=162)                  | BPb | Pb negatively correlated with weight.                                                                                                                                                                                                                                                 |
| (Huo et al., 2007)    | Guiyu vs. Chendian<br>(median 5.0 years,<br>n=226) | BPb | No differences in height, weight, chest circumference, or head circumference.                                                                                                                                                                                                         |
| (Lin et al., 2017b)   | Guiyu vs. Haojiang<br>(3 ~7 years, n=284)          | BPb | Lower weight (17.05 vs. 18.00 kg, $p<0.05$ ), chest circumference (51.51 vs. 52.81 cm, $p<0.01$ ) and head circumference (49.82 vs. 50.47 cm, $p=0.05$ ), no difference in height.                                                                                                    |
| (Zeng et al., 2019a)  | Guiyu vs. Haojiang<br>(preschool, n=470)           | BPb | Lower chest circumference (51.18 vs. 51.95 cm, $p<0.05$ ) and BMI (15.61 vs. 16.12 kg/m <sup>2</sup> , $p<0.01$ ). Pb negatively correlated with height ( $p<0.001$ ), weight ( $p<0.001$ ), BMI ( $p<0.05$ ), head circumference ( $p<0.05$ ), and chest circumference ( $p<0.05$ ). |
| (Lu et al., 2018)     | Guiyu vs. Haojiang<br>(3 ~7 years, n=590)          | BPb | Higher BMI (15.67 vs. 15.06 kg/m <sup>2</sup> , $p<0.001$ ).                                                                                                                                                                                                                          |
| (Zeng et al., 2018)   | Guiyu vs. Haojiang<br>(3 ~7 years, n=466)          | BPb | No differences in height, weight or BMI.                                                                                                                                                                                                                                              |
| (Cao et al., 2018)    | Guiyu vs. Haojiang<br>(3 ~7 years, n=118)          | BPb | No differences in height, weight.                                                                                                                                                                                                                                                     |
| (Zhang et al., 2016)  | Guiyu vs. Haojiang<br>(3 ~7 years, n=411)          | BPb | No differences in height, weight or BMI.                                                                                                                                                                                                                                              |
| (Xu et al., 2020)     | Guiyu vs. Haojiang<br>(3 ~7 years, n=116)          | BPb | No differences in height, weight or BMI.                                                                                                                                                                                                                                              |
| (Xu et al., 2015c)    | Guiyu vs. Chendian<br>(3 ~7 years, n=167)          | BPb | Higher BMI (15.3 vs. 14.8 kg/m <sup>2</sup> , $p<0.01$ ). No differences in height, weight, chest circumference or head circumference (all $p>0.05$ ). Pb positively correlated with height.                                                                                          |
| (Zhang et al., 2017b) | Guiyu vs. Haojiang<br>(3 ~7 years, n=294)          | BPb | Lower BMI (14.73 vs. 16.06 kg/m <sup>2</sup> , $p<0.001$ ).                                                                                                                                                                                                                           |

|                       |                                               |     |                                                                                                                                                                                              |
|-----------------------|-----------------------------------------------|-----|----------------------------------------------------------------------------------------------------------------------------------------------------------------------------------------------|
| (Lin et al., 2016)    | Guiyu vs. Haojiang<br>(2 ~7 years, n=378)     | BPb | No differences in height, weight, chest circumference or head circumference.                                                                                                                 |
| (Zeng et al., 2016)   | Guiyu vs. Haojiang<br>(3 ~8 years, n=470)     | BPb | Lower chest circumference (51.18 vs. 51.95 cm, $p<0.05$ ) and BMI (15.61 vs. 16.12 kg/m <sup>2</sup> , $p<0.01$ ) in Guiyu children, no differences in head circumference, height or weight. |
| (Liu et al., 2018a)   | Guiyu vs. Nanao<br>(3 years, n=284)           | BPb | Higher BMI (15.47 vs. 14.96 kg/m <sup>2</sup> , $p<0.01$ ).                                                                                                                                  |
| (Guo et al., 2014)    | Guiyu vs. Haojiang<br>(under 11 years, n=837) | BPb | Lower height (105.95 vs. 104.52) and weight (17.25 vs. 17.72 kg) (both $p<0.05$ ), no differences in chest circumference, head circumference (both $p>0.05$ ).                               |
| (Xu et al., 2015a)    | Guiyu vs. Haojiang<br>(3 ~7 years, n=590)     | BPb | Lower weight (17.14 vs. 17.94 kg) and chest circumference (51.65 vs. 52.53 cm) (both $p<0.01$ ), no differences in height and head circumference.                                            |
| (Zheng et al., 2019)  | Guiyu vs. Haojiang<br>(3 ~7 years, n=203)     | BPb | Lower height (104.70 vs. 108.71), weight (16.68 vs. 18.81 kg) and BMI (15.17 vs. 15.80 kg/m <sup>2</sup> ) (all $p<0.01$ ).                                                                  |
| (Liu et al., 2015b)   | Guiyu vs. Nanao<br>(3 years, n=284)           | BPb | Higher BMI (15.47 vs. 14.96 kg/m <sup>2</sup> , $p<0.01$ ).                                                                                                                                  |
| (Zheng et al., 2021)  | Guiyu vs. Haojiang<br>(2 ~7 years, n=324)     | BPb | Higher BMI (15.57 vs. 15.08 kg/m <sup>2</sup> , $p=0.025$ ).                                                                                                                                 |
| (Chen et al., 2021)   | Guiyu vs. Haojiang<br>(3 ~7 years, n=486)     | BPb | Lower BMI (14.7 vs. 15.9 kg/m <sup>2</sup> , $p<0.001$ )                                                                                                                                     |
| (Hou et al., 2020)    | Guiyu vs. Haojiang                            | BPb | Lower BMI (14.97 vs. 15.42 kg/m <sup>2</sup> , $p<0.001$ )                                                                                                                                   |
| (Zhang et al., 2020b) | Guiyu vs. Haojiang<br>(2 ~7 years, n=147)     | BPb | No differences in BMI.                                                                                                                                                                       |
| (Zhang et al., 2020a) | Guiyu vs. Haojiang<br>(3 ~7 years, n=207)     | BPb | No differences in BMI.                                                                                                                                                                       |

#### **Adverse birth outcomes**

|                      |                                                    |           |                                                                                                                                                                                 |
|----------------------|----------------------------------------------------|-----------|---------------------------------------------------------------------------------------------------------------------------------------------------------------------------------|
| (Xu et al., 2012)    | Guiyu vs. Xiamen<br>(Neonate, n=244493)            | UCB-Pb    | Higher rates of adverse birth outcomes (stillbirth, low birth weight, term low birth weight and lower Apgar scores) (all $p<0.01$ ). birth weight 3.17 kg vs. 3.26 kg, $p<0.01$ |
| (Li et al., 2008c)   | Guiyu vs. Chaonan<br>(Neonate, n=152)              | MPb, CBPb | No differences in birth height, birth weight, or Apgar scores.                                                                                                                  |
| (Lin et al., 2013)   | Guiyu vs. Chaonan<br>(mother–infant pairs, n=320)  | PCPb      | Lower birth weight ( $p<0.05$ ) and Apgar scores ( $p<0.01$ ), longer birth length ( $p<0.05$ ).                                                                                |
| (Guo et al., 2010)   | Guiyu vs. Shantou<br>(mother–infant pairs, n=220)  | PCPb      | No differences in birth height, birth weight, or Apgar scores.                                                                                                                  |
| (Zhang et al., 2011) | Guiyu vs. Shantou<br>(mother–infant pairs, n=105)  | PCPb      | No differences in birth height, birth weight, or Apgar scores.                                                                                                                  |
| (Qiu, 2012)          | Guiyu vs. Control<br>(mother-infant pairs, n=281)  | PCPb      | Shorter birth length ( $p<0.01$ ). No difference in birth weight.                                                                                                               |
| (Xu et al., 2016)    | Guiyu vs. Haojiang<br>(mother–infant pairs, n=185) | PCPb      | Shorter birth length in Guiyu neonates ( $p<0.01$ )                                                                                                                             |
| (Ni et al., 2014b)   | Guiyu vs. Shantou<br>(mother-infant pairs, n=201)  | UCB-Pb    | No differences in birth length, birth weight.                                                                                                                                   |
| (Zeng et al., 2016)  | Guiyu vs. Haojiang<br>(3 ~8 years, n=470)          | BPb       | Lower birth weight ( $p<0.01$ ), shorter birth length ( $p<0.05$ ).                                                                                                             |
| (Liu et al., 2018a)  | Guiyu vs. Nanao<br>(3 years, n=284)                | BPb       | No differences in birth BMI.                                                                                                                                                    |

|                                  |                                                  |        |                                                                                                                                                                                                                                   |
|----------------------------------|--------------------------------------------------|--------|-----------------------------------------------------------------------------------------------------------------------------------------------------------------------------------------------------------------------------------|
| (Zeng et al., 2019a)             | Guiyu vs. Haojiang (preschool, n=470)            | BPb    | Lower birth weight ( $p<0.01$ ), shorter birth length ( $p<0.05$ ).                                                                                                                                                               |
| (Zeng et al., 2017)              | Guiyu vs. Haojiang & Xiashan (5 ~7 years, n=206) | BPb    | Lower birth weight ( $p<0.05$ ).                                                                                                                                                                                                  |
| (Huo et al., 2014)               | Guiyu vs. Chendian (mother-infant pairs, n=504)  | BPb    | No differences in birth height, birth weight, or Apgar scores.                                                                                                                                                                    |
| (Kim et al., 2020)               | Guiyu vs. Shantou (mother-infant pairs, n=634)   | BPb    | Lower birth weight, head circumference and BMI, longer birth length                                                                                                                                                               |
| (Zeng et al., 2019b)             | Guiyu vs. Haojiang (mother-infant pairs, n=204)  | UCB-Pb | Lower birth BMI ( $p<0.001$ ).                                                                                                                                                                                                    |
| <b><u>Respiratory system</u></b> |                                                  |        |                                                                                                                                                                                                                                   |
| (Zeng et al., 2017)              | Guiyu vs. Haojiang & Xiashan (5 ~7 years, n=206) | BPb    | Lower lung function (FVC and FEV1) levels in Guiyu children. No significant difference in FVC/FEV1. No significant association between Pb and FVC, FEV1.                                                                          |
| (Zeng et al., 2016)              | Guiyu vs. Haojiang (3 ~8 years, n=470)           | BPb    | Higher prevalence of cough, phlegm, dyspnea, and wheeze were in Guiyu children.                                                                                                                                                   |
| <b><u>Thyroid function</u></b>   |                                                  |        |                                                                                                                                                                                                                                   |
| (Liu et al., 2018a)              | Guiyu vs. Nanao (3 years, n=284)                 | BPb    | Higher levels of FT4 (16.65 vs. 16.06 pmol/L, $p<0.01$ ) and TSH (2.79 vs. 2.21 mIU/L, $p<0.01$ ) in Guiyu children. Exposure to Pb affects thyroid function. Both FT4 and TSH were positively related to the recycling industry. |
| <b><u>Hepatic function</u></b>   |                                                  |        |                                                                                                                                                                                                                                   |

|                                                                 |                                                    |                |                                                                                                                                                                           |
|-----------------------------------------------------------------|----------------------------------------------------|----------------|---------------------------------------------------------------------------------------------------------------------------------------------------------------------------|
| (Chen et al., 2019)                                             | Guiyu vs. Jinping<br>(4~85 years, n=267)           | BPb            | Higher activity of serum GGT ( $p<0.005$ ) in Guiyu residents. Exposure of Pb is linked with risk of abnormal liver function.                                             |
| <b><u>Oral anti-inflammatory and anti-microbial ability</u></b> |                                                    |                |                                                                                                                                                                           |
| (Hou et al., 2020)                                              | Guiyu vs. Haojiang<br>(2.5 ~6 years, n=574)        | BPb            | BPb negatively correlated with salivary sialic acids. The prevalence of dental caries in deciduous teeth was significantly higher in the Guiyu children than in Haojiang. |
| (Zhang et al., 2020a)                                           | Guiyu vs. Haojiang<br>(3 ~7 years, n=207)          | BPb            | BPb negatively correlated with saliva salivary agglutinin (SAG).                                                                                                          |
| <b><u>Gestational age (weeks)</u></b>                           |                                                    |                |                                                                                                                                                                           |
| (Xu et al., 2016)                                               | Guiyu vs. Haojiang<br>(mother–infant pairs, n=185) | PCPb           | Longer gestational age (40.86 vs. 39.54, $p<0.001$ ) in Guiyu group. No significant correlation between Pb and gestational age.                                           |
| (Xu et al., 2012)                                               | Guiyu vs. Xiamen<br>(Neonate, n= 244493)           | UCB-Pb         | Longer gestational age (39.5 vs. 38.9, $p<0.01$ ).                                                                                                                        |
| (Li et al., 2008c)                                              | Guiyu vs. Chaonan<br>(Neonate)                     | MPb,<br>UCB-Pb | No significant difference of gestational age.                                                                                                                             |
| (Guo et al., 2010)                                              | Guiyu vs. Shantou<br>(mother–infant pairs, n=220)  | PCPb           | No significant difference of gestational age.                                                                                                                             |
| (Lin et al., 2013)                                              | Guiyu vs. Chaonan<br>(mother–infant pairs, n=320)  | PCPb           | Longer gestational age (39.69 vs. 39.28, $p<0.05$ ).                                                                                                                      |
| (Zhang et al., 2011)                                            | Guiyu vs. Shantou<br>(mother–infant pairs, n=105)  | PCPb           | No significant difference of gestational age.                                                                                                                             |
| (Qiu et al., 2012)                                              | Guiyu vs. Shantou                                  | PCPb           | PCPb correlated with gestational age.                                                                                                                                     |

|                                                       |                                                       |        |                                                                                                                                                                               |
|-------------------------------------------------------|-------------------------------------------------------|--------|-------------------------------------------------------------------------------------------------------------------------------------------------------------------------------|
|                                                       | (mother–infant pairs,<br>n=251)                       |        |                                                                                                                                                                               |
| (Huo et al., 2014)                                    | Guiyu vs. Chendian<br>(mother–infant pairs,<br>n=504) | UCB-Pb | No significant difference of gestational age between two groups.                                                                                                              |
| <b><u>Chromosome, DNA damage and epigenotoxic</u></b> |                                                       |        |                                                                                                                                                                               |
| (Ni et al., 2014b)                                    | Guiyu vs. Shantou<br>(pregnant women, n=201)          | UCB-Pb | No significant association between 8-OHdG and CBPb.                                                                                                                           |
| (Lin et al., 2013)                                    | Guiyu vs. Chaonan<br>(Neonate, n=320)                 | PCPb   | No significant correlation between PCPb and placental telomere length.                                                                                                        |
| (Zhang et al., 2011)                                  | Guiyu vs. Shantou<br>(mother–infant pairs,<br>n=105)  | PCPb   | Higher MT levels ( $p<0.01$ ), and lower S100P protein levels ( $p<0.05$ ) and mRNA ( $p<0.001$ ) in Guiyu placentas. No correlation between PCPb and S100P or MT expression. |
| (Xu et al., 2018)                                     | Guiyu only<br>(3 ~6 years, n=118)                     | BPb    | 8-OHdG 407.79 (152.05~876.26) ng/g creatinine, hOGG1 mRNA expression level 0.038 (0.009~0.542). Children with high Pb had significantly higher 8-OHdG than low Pb exposure.   |
| (Liao et al., 2011)                                   | Guiyu only<br>(3 ~7 years, n=118)                     | BPb    | Pb exposure can affect urine 8-OHdG level, association between increase of oxidative stress level and higher Pb.                                                              |
| (Zeng et al., 2019b)                                  | Guiyu vs. Haojiang<br>(mother–infant pairs,<br>n=204) | UCB-Pb | Differential methylation of two CpGs of BAI1 and CTNNA2 involved in brain neuronal development in newborns which were associated with the maternal Pb exposure                |

\* blood Pb (BPb); erythrocyte Pb (EPb); Umbilical cord blood Pb (UCB-Pb); placenta Pb (PCPb); meconium Pb (MPb);



## Reference:

- Cai, H., Xu, X., Zhang, Y., Cong, X., Lu, X., Huo, X., 2019. Elevated lead levels from e-waste exposure are linked to sensory integration difficulties in preschool children. *Neurotoxicology* 71, 150-158.
- Cao, J., Xu, X., Zhang, Y., Zeng, Z., Hylkema, M.N., Huo, X., 2018. Increased memory T cell populations in Pb-exposed children from an e-waste-recycling area. *Sci Total Environ* 616-617, 988-995.
- Chen, X., Zhang, R., Peng, Z., Chen, X., Chen, L., Wang, H., Cai, Z., Qin, S., Liu, B., Huo, X., Lin, W., Wang, T., Ma, L., 2013. Effects of lead exposure on attention deficit hyperactivity disorder in children from an e-waste recycling area. *Beijing Medical Journal (in Chinese)* 35, 249-252.
- Chen, Y., Xu, X., Zeng, Z., Lin, X., Qin, Q., Huo, X., 2019. Blood lead and cadmium levels associated with hematological and hepatic functions in patients from an e-waste-polluted area. *Chemosphere* 220, 531-538.
- Chen, Z., Huo, X., Zhang, S., Cheng, Z., Huang, Y., Xu, X., 2021. Relations of blood lead levels to echocardiographic left ventricular structure and function in preschool children. *Chemosphere* 268, 128793.
- Dai, Y., Huo, X., Zhang, Y., Yang, T., Li, M., Xu, X., 2017. Elevated lead levels and changes in blood morphology and erythrocyte CR1 in preschool children from an e-waste area. *Sci Total Environ* 592, 51-59.
- Guo, P., Xu, X., Huang, B., Sun, D., Zhang, J., Chen, X., Zhang, Q., Huo, X., Hao, Y., 2014. Blood lead levels and associated factors among children in Guiyu of China: a population-based study. *PLoS One* 9, e105470.
- Guo, Y., Huo, X., Li, Y., Wu, K., Liu, J., Huang, J., Zheng, G., Xiao, Q., Yang, H., Wang, Y., Chen, A., Xu, X., 2010. Monitoring of lead, cadmium, chromium and nickel in placenta from an e-waste recycling town in China. *Sci Total Environ* 408, 3113-3117.
- Han, D., Huo, X., Zheng, L., Li, Y., 2007. Investigation on blood lead and intelligence levels of children in electronic waste recycling area. *Journal of Shantou University Medical College (in Chinese)*, 170-172+175.
- Hou, R., Huo, X., Zhang, S., Xu, C., Huang, Y., Xu, X., 2020. Elevated levels of lead exposure and impact on the anti-inflammatory ability of oral sialic acids among preschool children in e-waste areas. *Sci Total Environ* 699, 134380.
- Huang, Y., Ni, W., Chen, Y., Wang, X., Zhang, J., Wu, K., 2015. Levels and risk factors of antimony contamination in human hair from an electronic waste recycling area, Guiyu, China. *Environ Sci Pollut Res Int* 22, 7112-7119.
- Huo, X., Dai, Y., Yang, T., Zhang, Y., Li, M., Xu, X., 2019. Decreased erythrocyte CD44 and CD58 expression link e-waste Pb toxicity to changes in erythrocyte immunity in preschool children. *Sci Total Environ* 664, 690-697.
- Huo, X., Peng, L., Qiu, B., Zheng, L., Yekeen, T.A., Xu, X., 2014. ALAD genotypes and blood lead levels of neonates and children from e-waste exposure in Guiyu, China. *Environ Sci Pollut Res Int* 21, 6744-6750.
- Huo, X., Peng, L., Xu, X., Zheng, L., Qiu, B., Qi, Z., Zhang, B., Han, D., Piao, Z., 2007. Elevated blood lead levels of children in Guiyu, an electronic waste recycling town in China. *Environ Health Perspect* 115, 1113-1117.
- Kim, S., Xu, X., Zhang, Y., Zheng, X., Liu, R., Dietrich, K., Reponen, T., Ho, S.M., Xie, C., Sucharew, H., Huo, X., Chen, A., 2019. Metal concentrations in pregnant women and neonates from informal electronic waste recycling. *J Expo Sci Environ Epidemiol* 29, 406-415.

Kim, S.S., Xu, X., Zhang, Y., Zheng, X., Liu, R., Dietrich, K.N., Reponen, T., Xie, C., Sucharew, H., Huo, X., Chen, A., 2020. Birth outcomes associated with maternal exposure to metals from informal electronic waste recycling in Guiyu, China. *Environ Int* 137, 105580.

Li, Y., Huo, X., Liu, J., Peng, L., Li, W., Xu, X., 2011. Assessment of cadmium exposure for neonates in Guiyu, an electronic waste pollution site of China. *Environ Monit Assess* 177, 343-351.

Li, Y., Huo, X., Wu, K., Liu, J., Ban, H., Xu, X., 2010. Placental cadmium concentration and the levels of metallothionein expression in an electronic waste environmental polluted site. *Carcinogenesis, Teratogenesis & Mutagenesis (in Chinese)* 22, 115-118.

Li, Y., Xu, X., Liu, J., Wu, K., Gu, C., Shao, G., Chen, S., Chen, G., Huo, X., 2008a. The hazard of chromium exposure to neonates in Guiyu of China. *Sci Total Environ* 403, 99-104.

Li, Y., Xu, X., Liu, J., Zheng, G., Chen, S., Huo, X., 2008b. Determination of meconium lead Level of newborn by graphite furnace atomic absorption spectrometry. *Spectroscopy and Spectral Analysis (in Chinese)*, 447-449.

Li, Y., Xu, X., Wu, K., Chen, G., Liu, J., Chen, S., Gu, C., Zhang, B., Zheng, L., Zheng, M., Huo, X., 2008c. Monitoring of lead load and its effect on neonatal behavioral neurological assessment scores in Guiyu, an electronic waste recycling town in China. *J Environ Monit* 10, 1233-1238.

Liao, W., Huo, X., Liu, W., Yang, H., Ji, M., Xu, X., 2011. Influence of lead exposure on urine 8-hydroxy-2'-deoxyguanosine of children in an electronic waste recycling area. *Journal of Shantou University Medical College (in Chinese)* 24, 32-34.

Lin, J., Huo, X., Huang, J., Zheng, G., Xu, X., 2010. Relationship between blood cadmium and red blood cell parameters in children aged 3~7 years in Guiyu area of Guangdong Province. *Journal of Shantou University Medical College (in Chinese)* 23, 100-101+110.

Lin, S., Huo, X., Zhang, Q., Fan, X., Du, L., Xu, X., Qiu, S., Zhang, Y., Wang, Y., Gu, J., 2013. Short placental telomere was associated with cadmium pollution in an electronic waste recycling town in China. *PLoS One* 8, e60815.

Lin, X., Du, D., Chen, S., Chen, X., 2017a. The correlation between heavy metal exposure and parkinson disease in electronic waste dismantling area. *Shenzhen Journal of Integrated Traditional Chinese and Western Medicine November (in Chinese)* 27, 1-3.

Lin, X., Xu, X., Zeng, X., Xu, L., Zeng, Z., Huo, X., 2017b. Decreased vaccine antibody titers following exposure to multiple metals and metalloids in e-waste-exposed preschool children. *Environ Pollut* 220, 354-363.

Lin, Y., Xu, X., Dai, Y., Zhang, Y., Li, W., Huo, X., 2016. Considerable decrease of antibody titers against measles, mumps, and rubella in preschool children from an e-waste recycling area. *Sci Total Environ* 573, 760-766.

Liu, C., Huo, X., Lin, P., Zhang, Y., Li, W., Xu, X., 2015a. Association between blood erythrocyte lead concentrations and hemoglobin levels in preschool children. *Environ Sci Pollut Res Int* 22, 9233-9240.

Liu, J., Xu, X., Wu, K., Piao, Z., Huang, J., Guo, Y., Li, W., Zhang, Y., Chen, A., Huo, X., 2011a. Association between lead exposure from electronic waste recycling and child temperament alterations. *Neurotoxicology* 32, 458-464.

Liu, L., Xu, X., Yekeen, T.A., Lin, K., Li, W., Huo, X., 2015b. Assessment of association between the dopamine D2 receptor (DRD2) polymorphism and neurodevelopment of children exposed to lead. *Environ Sci Pollut Res Int* 22, 1786-1793.

Liu, L., Zhang, B., Lin, K., Zhang, Y., Xu, X., Huo, X., 2018a. Thyroid disruption and reduced mental development in children from an informal e-waste recycling area: A mediation analysis. *Chemosphere*

193, 498-505.

Liu, W., Huo, X., Liu, D., Zeng, X., Zhang, Y., Xu, X., 2014. S100 $\beta$  in heavy metal-related child attention-deficit hyperactivity disorder in an informal e-waste recycling area. *Neurotoxicology* 45, 185-191.

Liu, W., Yang, H., Liao, W., Qiu, S., Huo, X., Xu, X., 2011b. Study on blood chromium levels and behavior effect of children in electronic waste recycling area. *Journal of Shantou University Medical College (in Chinese)* 24, 26-29.

Liu, Y., Huo, X., Xu, L., Wei, X., Wu, W., Wu, X., Xu, X., 2018b. Hearing loss in children with e-waste lead and cadmium exposure. *Sci Total Environ* 624, 621-627.

Lu, X., Xu, X., Zhang, Y., Zhang, Y., Wang, C., Huo, X., 2018. Elevated inflammatory Lp-PLA2 and IL-6 link e-waste Pb toxicity to cardiovascular risk factors in preschool children. *Environ Pollut* 234, 601-609.

Ni, W., Chen, Y., Huang, Y., Wang, X., Zhang, G., Luo, J., Wu, K., 2014a. Hair mercury concentrations and associated factors in an electronic waste recycling area, Guiyu, China. *Environ Res* 128, 84-91.

Ni, W., Huang, Y., Wang, X., Zhang, J., Wu, K., 2014b. Associations of neonatal lead, cadmium, chromium and nickel co-exposure with DNA oxidative damage in an electronic waste recycling town. *Sci Total Environ* 472, 354-362.

Peng, L., Huo, X., Xu, X., Zhang, Y., Qiu, B., 2005. Effects of electronic waste recycling-disposing contamination on children's blood lead level. *Journal of Shantou University Medical College (in Chinese)*, 48-50.

Qiu, S., 2012. Lead and Cadmium Occurrence in Placenta and Associated Factors in Guiyu, China. 2012.

Qiu, S., Huo, X., Liu, J., Li, B., Akangbe, Y.T., Zhang, Y., Xu, X., 2012. Association between prenatal lead and cadmium exposure from electronic waste recycling and the development of neonate. *Journal of Shantou University Medical College (in Chinese)* 25, 138-140.

Sun, D., Zhang, J., Huang, B., Zhang, Y., Xu, X., Huo, X., 2012. Effect of lead and cadmium exposure on the levels of innate immune cell in preschool children. *Journal of Shantou University Medical College (in Chinese)* 25, 193-195.

Wang, H., Huang, P., Zhang, R., Feng, X., Tang, Q., Liu, S., Wen, F., Zeng, L., Liu, Y., Wang, T., Ma, L., 2021. Effect of lead exposure from electronic waste on haemoglobin synthesis in children. *Int Arch Occup Environ Health*.

Xu, L., Ge, J., Huo, X., Zhang, Y., Lau, A.T.Y., Xu, X., 2016. Differential proteomic expression of human placenta and fetal development following e-waste lead and cadmium exposure in utero. *Sci Total Environ* 550, 1163-1170.

Xu, L., Huo, X., Liu, Y., Zhang, Y., Qin, Q., Xu, X., 2020. Hearing loss risk and DNA methylation signatures in preschool children following lead and cadmium exposure from an electronic waste recycling area. *Chemosphere* 246, 125829.

Xu, X., Chen, X., Zhang, J., Guo, P., Fu, T., Dai, Y., Lin, S.L., Huo, X., 2015a. Decreased blood hepatitis B surface antibody levels linked to e-waste lead exposure in preschool children. *J Hazard Mater* 298, 122-128.

Xu, X., Chiung, Y.M., Lu, F., Qiu, S., Ji, M., Huo, X., 2015b. Associations of cadmium, bisphenol A and polychlorinated biphenyl co-exposure in utero with placental gene expression and neonatal outcomes. *Reprod Toxicol* 52, 62-70.

Xu, X., Liao, W., Lin, Y., Dai, Y., Shi, Z., Huo, X., 2018. Blood concentrations of lead, cadmium, mercury

and their association with biomarkers of DNA oxidative damage in preschool children living in an e-waste recycling area. *Environ Geochem Health* 40, 1481-1494.

Xu, X., Liu, J., Huang, C., Lu, F., Chiung, Y.M., Huo, X., 2015c. Association of polycyclic aromatic hydrocarbons (PAHs) and lead co-exposure with child physical growth and development in an e-waste recycling town. *Chemosphere* 139, 295-302.

Xu, X., Liu, J., Zeng, X., Lu, F., Chen, A., Huo, X., 2014. Elevated serum polybrominated diphenyl ethers and alteration of thyroid hormones in children from Guiyu, China. *PLoS One* 9, e113699.

Xu, X., Peng, L., Li, W., Qiu, B., Huo, X., 2006. Investigation of blood lead level of children aged 1~6 in electronic waste disposing district. *Journal of Environment and Health (in Chinese)*, 58-60.

Xu, X., Yang, H., Chen, A., Zhou, Y., Wu, K., Liu, J., Zhang, Y., Huo, X., 2012. Birth outcomes related to informal e-waste recycling in Guiyu, China. *Reprod Toxicol* 33, 94-98.

Xu, X., Yekeen, T.A., Liu, J., Zhuang, B., Li, W., Huo, X., 2015d. Chromium exposure among children from an electronic waste recycling town of China. *Environ Sci Pollut Res Int* 22, 1778-1785.

Yang, H., Huo, X., Yekeen, T.A., Zheng, Q., Zheng, M., Xu, X., 2013. Effects of lead and cadmium exposure from electronic waste on child physical growth. *Environ Sci Pollut Res Int* 20, 4441-4447.

Zeng, X., Xu, C., Xu, X., Zhang, Y., Huang, Y., Huo, X., 2021. Elevated lead levels in relation to low serum neuropeptide Y and adverse behavioral effects in preschool children with e-waste exposure. *Chemosphere* 269, 129380.

Zeng, X., Xu, X., Boezen, H.M., Vonk, J.M., Wu, W., Huo, X., 2017. Decreased lung function with mediation of blood parameters linked to e-waste lead and cadmium exposure in preschool children. *Environ Pollut* 230, 838-848.

Zeng, X., Xu, X., Qin, Q., Ye, K., Wu, W., Huo, X., 2019a. Heavy metal exposure has adverse effects on the growth and development of preschool children. *Environ Geochem Health* 41, 309-321.

Zeng, X., Xu, X., Zheng, X., Reponen, T., Chen, A., Huo, X., 2016. Heavy metals in PM<sub>2.5</sub> and in blood, and children's respiratory symptoms and asthma from an e-waste recycling area. *Environ Pollut* 210, 346-353.

Zeng, Z., Huo, X., Zhang, Y., Hylkema, M.N., Wu, Y., Xu, X., 2019b. Differential DNA methylation in newborns with maternal exposure to heavy metals from an e-waste recycling area. *Environ Res* 171, 536-545.

Zeng, Z., Huo, X., Zhang, Y., Xiao, Z., Zhang, Y., Xu, X., 2018. Lead exposure is associated with risk of impaired coagulation in preschool children from an e-waste recycling area. *Environ Sci Pollut Res Int* 25, 20670-20679.

Zhang, B., Huo, X., Xu, L., Cheng, Z., Cong, X., Lu, X., Xu, X., 2017a. Elevated lead levels from e-waste exposure are linked to decreased olfactory memory in children. *Environ Pollut* 231, 1112-1121.

Zhang, Q., Zhou, T., Xu, X., Guo, Y., Zhao, Z., Zhu, M., Li, W., Yi, D., Huo, X., 2011. Downregulation of placental S100P is associated with cadmium exposure in Guiyu, an e-waste recycling town in China. *Sci Total Environ* 410-411, 53-58.

Zhang, R., Huo, X., Ho, G., Chen, X., Wang, H., Wang, T., Ma, L., 2015. Attention-deficit/hyperactivity symptoms in preschool children from an e-waste recycling town: assessment by the parent report derived from DSM-IV. *BMC Pediatr* 15, 51.

Zhang, S., Huo, X., Li, M., Hou, R., Cong, X., Xu, X., 2020a. Oral antimicrobial activity weakened in children with electronic waste lead exposure. *Environ Sci Pollut Res Int* 27, 14763-14770.

Zhang, Y., Huo, X., Cao, J., Yang, T., Xu, L., Xu, X., 2016. Elevated lead levels and adverse effects on natural killer cells in children from an electronic waste recycling area. *Environ Pollut* 213, 143-150.

Zhang, Y., Huo, X., Lu, X., Zeng, Z., Faas, M.M., Xu, X., 2020b. Exposure to multiple heavy metals associate with aberrant immune homeostasis and inflammatory activation in preschool children. *Chemosphere* 257, 127257.

Zhang, Y., Xu, X., Chen, A., Davuljigari, C.B., Zheng, X., Kim, S.S., Dietrich, K.N., Ho, S.M., Reponen, T., Huo, X., 2018. Maternal urinary cadmium levels during pregnancy associated with risk of sex-dependent birth outcomes from an e-waste pollution site in China. *Reprod Toxicol* 75, 49-55.

Zhang, Y., Xu, X., Sun, D., Cao, J., Zhang, Y., Huo, X., 2017b. Alteration of the number and percentage of innate immune cells in preschool children from an e-waste recycling area. *Ecotoxicol Environ Saf* 145, 615-622.

Zheng, G., Xu, X., Li, B., Wu, K., Yekeen, T.A., Huo, X., 2013. Association between lung function in school children and exposure to three transition metals from an e-waste recycling area. *J Expo Sci Environ Epidemiol* 23, 67-72.

Zheng, L., Wu, K., Li, Y., Qi, Z., Han, D., Zhang, B., Gu, C., Chen, G., Liu, J., Chen, S., Xu, X., Huo, X., 2008. Blood lead and cadmium levels and relevant factors among children from an e-waste recycling town in China. *Environ Res* 108, 15-20.

Zheng, X., Huo, X., Zhang, Y., Wang, Q., Zhang, Y., Xu, X., 2019. Cardiovascular endothelial inflammation by chronic coexposure to lead (Pb) and polycyclic aromatic hydrocarbons from preschool children in an e-waste recycling area. *Environ Pollut* 246, 587-596.

Zheng, X., Xu, X., Lu, F., Wang, Q., Zeng, Z., Huo, X., 2021. High serum IgG subclass concentrations in children with e-waste Pb and Cd exposure. *Sci Total Environ* 764, 142806.

Zhuang, B., Lu, F., Fu, T., Liu, Y., Huo, X., Xu, X., 2015. Investigation and analysis of prenatal mercury exposure in neonates. *Journal of Shantou University Medical College (in Chinese)* 28, 10-12.
